# Supplementary material for: β4 and β6 Integrin Expression Is Associated with the Subclassification and Clinicopathological Features of Intrahepatic Cholangiocarcinoma
Source: MDPI journal article supplement (doi:10.3390/ijms19041004), 2018-03-27
Supplement: s1 [file s1]

**Supplemental Table S2.** Relationship between transforming growth factor (TGF)- $\beta$ 1 expression and clinicopathological characteristics of intrahepatic cholangiocarcinoma.

|                 |                | Number of cases | TGF-β1 expression |               |         |
|-----------------|----------------|-----------------|-------------------|---------------|---------|
|                 |                | (n = 48)        | ≤25%              | >25%          | p-Value |
|                 |                |                 | (n = 26)          | (n = 22)      |         |
| Gender          | Male           | 36              | 17                | 19            | 0.09    |
|                 | Female         | 12              | 9                 | 3             |         |
| Age (mean)      |                |                 | 71.9 (53-84)      | 69.0 (39-84)  | 0.33    |
| (years)         |                |                 |                   |               |         |
| Tumor size      |                |                 | 50.7 (18-110)     | 68.4 (20-220) | 0.16    |
| (mean) (mm)     |                |                 |                   |               |         |
| Localization    | Peripheral     | 38              | 22                | 16            | 0.26    |
|                 | Non-peripheral | 10              | 4                 | 6             |         |
| Macroscopic     | MF             | 42              | 24                | 18            | 0.26    |
| type            | MF+PI,         | 6               | 2                 | 4             |         |
|                 | IG+PI, PI      |                 |                   |               |         |
| Histological    | Well           | 6               | 5                 | 1             | 0.08    |
| differentiation | Moderate       | 29              | 12                | 17            |         |
|                 | Poor           | 13              | 9                 | 4             |         |
| Growth type     | Expansive      | 23              | 12                | 11            | 0.79    |
|                 | Infiltrative   | 25              | 14                | 11            |         |
| Serosa invasion | +              | 24              | 11                | 13            | 0.25    |
|                 | -              | 24              | 15                | 9             |         |
| Portal vein     | +              | 39              | 18                | 21            | 0.022*  |
| invasion        | -              | 9               | 8                 | 1             |         |
| Hepatic vein    | +              | 21              | 10                | 11            | 0.42    |
| invasion        | -              | 27              | 16                | 11            |         |
| Hepatic artery  | +              | 4               | 2                 | 2             | 0.63    |
| invasion        | -              | 44              | 24                | 20            |         |
| Bile duct       | +              | 26              | 12                | 14            | 0.23    |
| invasion        | -              | 22              | 14                | 8             |         |
| Intrahepatic    | +              | 21              | 8                 | 13            | 0.049*  |
| metastasis      | -              | 27              | 18                | 9             |         |
| Lymph node      | +              | 14              | 6                 | 8             | 0.31    |
| metastasis      | -              | 34              | 20                | 14            |         |

MF: mass-forming type, PI: periductal-infiltrating type, IG: intraductal-growth type; \*,  $p < 0.05$
