# Supplementary material for: β4 and β6 Integrin Expression Is Associated with the Subclassification and Clinicopathological Features of Intrahepatic Cholangiocarcinoma
Source: MDPI journal article supplement (doi:10.3390/ijms19041004), 2018-03-27
Supplement: s1 [file s1]

**Supplemental Table S1.** Relationship between  $\beta 6$  integrin expression and clinicopathological characteristics of intrahepatic cholangiocarcinoma.

|                 |                | Number of cases | β6 integrin expression |               |                 |
|-----------------|----------------|-----------------|------------------------|---------------|-----------------|
|                 |                | (n = 48)        | Negative               | Positive      | <i>p</i> -Value |
|                 |                |                 | (n = 13)               | (n = 35)      |                 |
| Gender          | Male           | 36              | 11                     | 25            | 0.29            |
|                 | Female         | 12              | 2                      | 10            |                 |
| Age (mean)      |                |                 | 73.7 (53-84)           | 69.4 (39-84)  | 0.26            |
| (years)         |                |                 |                        |               |                 |
| Tumor size      |                |                 | 60.2 (20-220)          | 58.3 (18-150) | 0.88            |
| (mean) (mm)     |                |                 |                        |               |                 |
| Localization    | Peripheral     | 38              | 13                     | 25            | 0.028*          |
|                 | Non-peripheral | 10              | 0                      | 10            |                 |
| Macroscopic     | MF             | 42              | 13                     | 29            | 0.13            |
| type            | MF+PI,         | 6               | 0                      | 6             |                 |
|                 | IG+PI, PI      |                 |                        |               |                 |
| Histological    | Well           | 6               | 1                      | 5             | 0.51            |
| differentiation | Moderate       | 29              | 7                      | 22            |                 |
|                 | Poor           | 13              | 5                      | 8             |                 |
| Growth type     | Expansive      | 23              | 9                      | 14            | 0.069           |
|                 | Infiltrative   | 25              | 4                      | 21            |                 |
| Serosa invasion | +              | 24              | 4                      | 20            | 0.096           |
|                 | -              | 24              | 9                      | 15            |                 |
| Portal vein     | +              | 39              | 9                      | 30            | 0.18            |
| invasion        | -              | 9               | 4                      | 5             |                 |
| Hepatic vein    | +              | 21              | 3                      | 18            | 0.074           |
| invasion        | -              | 27              | 10                     | 17            |                 |
| Hepatic artery  | +              | 4               | 1                      | 3             | 0.71            |
| invasion        | -              | 44              | 12                     | 32            |                 |
| Bile duct       | +              | 26              | 4                      | 22            | 0.048*          |
| invasion        | -              | 22              | 9                      | 13            |                 |
| Intrahepatic    | +              | 21              | 4                      | 17            | 0.21            |
| metastasis      | -              | 27              | 9                      | 18            |                 |
| Lymph node      | +              | 14              | 1                      | 13            | 0.045*          |
| metastasis      | -              | 34              | 12                     | 22            |                 |

MF: mass-forming type, PI: periductal-infiltrating type, IG: intraductal-growth type; \*,  $p < 0.05$
