# Supplementary material for: β4 and β6 Integrin Expression Is Associated with the Subclassification and Clinicopathological Features of Intrahepatic Cholangiocarcinoma
Source: MDPI journal article supplement (doi:10.3390/ijms19041004), 2018-03-27
Supplement: s1 [file s1]

**Supplemental Table S3.** Primary antibodies and antigen retrieval methods.

| Antibody                                   | Clone      | Dilution | Antigen retrieval   | Source       |
|--------------------------------------------|------------|----------|---------------------|--------------|
| Rabbit polyclonal anti- $\beta$ 4 integrin |            | 1:200    | pH9, 95°C, 40min    | Santa Cruz   |
| Mouse monoclonal anti- $\beta$ 6 integrin  | 442.5C4    | 1:400    | Proteinase K, 10min | Calbiochem   |
| Mouse monoclonal anti-laminin-5            | 4G1        | 1:50     | pH9, 95°C, 40min    | Agilent      |
| Mouse monoclonal anti-tenascin-C           | E-9        | 1:50     | pH9, 121°C, 15min   | Santa Cruz   |
| Mouse monoclonal anti-cytokeratin 7        | OV-TL12/30 | 1:60     | pH9, 95°C, 40min    | Agilent      |
| Mouse monoclonal anti-Hep Par-1            | OCH1E5     | 1:60     | pH6, 95°C, 40min    | Agilent      |
| Mouse monoclonal anti-EMA                  | E29        | 1:200    | pH6, 95°C, 40min    | Agilent      |
| Rabbit polyclonal anti-TGF-beta 1          |            | 1:200    | pH9, 95°C, 40min    | Protein tech |
| Mouse monoclonal anti-alpha-SMA            | 1A4        | 1:100    | pH6, 95°C, 20min    | Agilent      |

EMA: epithelial membrane antigen, SMA: smooth muscle actin
