# Supplementary figures and images for: β4 and β6 Integrin Expression Is Associated with the Subclassification and Clinicopathological Features of Intrahepatic Cholangiocarcinoma
Source: MDPI journal article supplement (doi:10.3390/ijms19041004), 2018-03-27

**Supplemental Figure S1.**

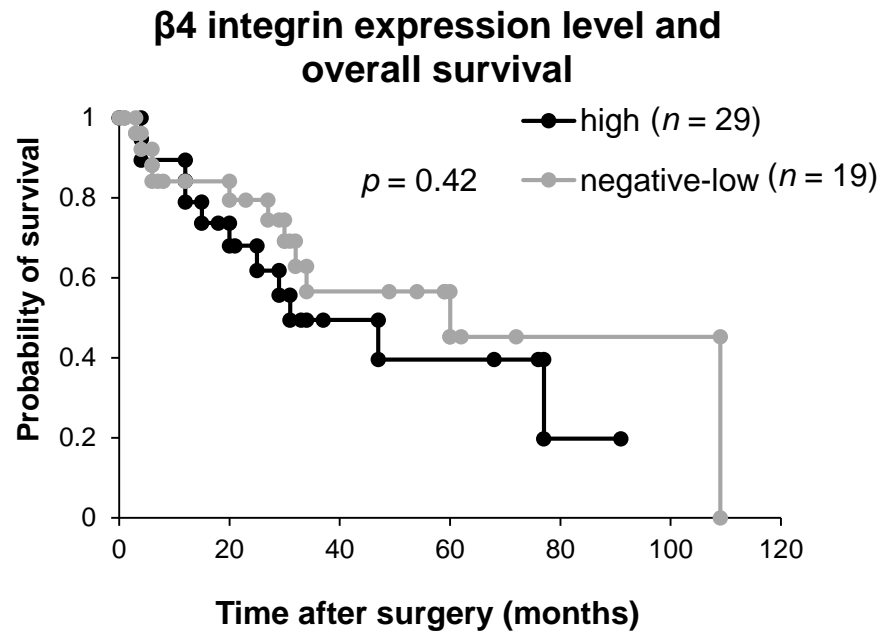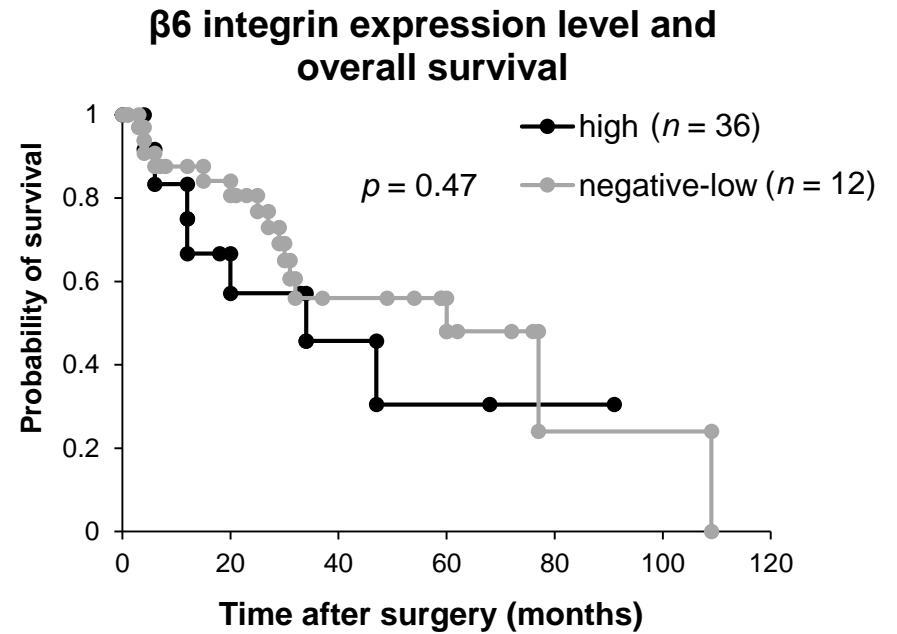

Supplement: s1 [file s1]
